# Supplementary material for: On the underlying mechanisms of the low observed nitrate selectivity in photocatalytic NOxabatement and the importance of the oxygen reduction reaction
Source: Royal Society of Chemistry journal article supplement (doi:10.1039/c7cp05960d), 2017-01-01

# On the Underlying Mechanisms of the Low Observed Nitrate Selectivity in Photocatalytic NO<sub>x</sub> Abatement and the Importance of the Oxygen Reduction Reaction

Julia Patzsch,<sup>a</sup> Andrea Folli,<sup>b</sup> Donald E. Macphee<sup>c</sup> and Jonathan Z. Bloh<sup>\*a</sup>

## Supporting Information

---

<sup>a</sup> *DECHEMA-Forschungsinstitut, Theodor-Heuss-Allee 25, 60486 Frankfurt am Main, Germany; E-mail: bloh@dechema.de*

<sup>b</sup> *School of Chemistry, Cardiff University, Main Building, Park Place, Cardiff CF10 3AT, Wales, United Kingdom.*

<sup>c</sup> *University of Aberdeen, Department of Chemistry, Meston Walk, Aberdeen AB24 3UE, United Kingdom.*

The following measurements were performed on a different batch of P25, therefore the numbers slightly deviate from the experiments reported in Figure 1+3 and Table 1.

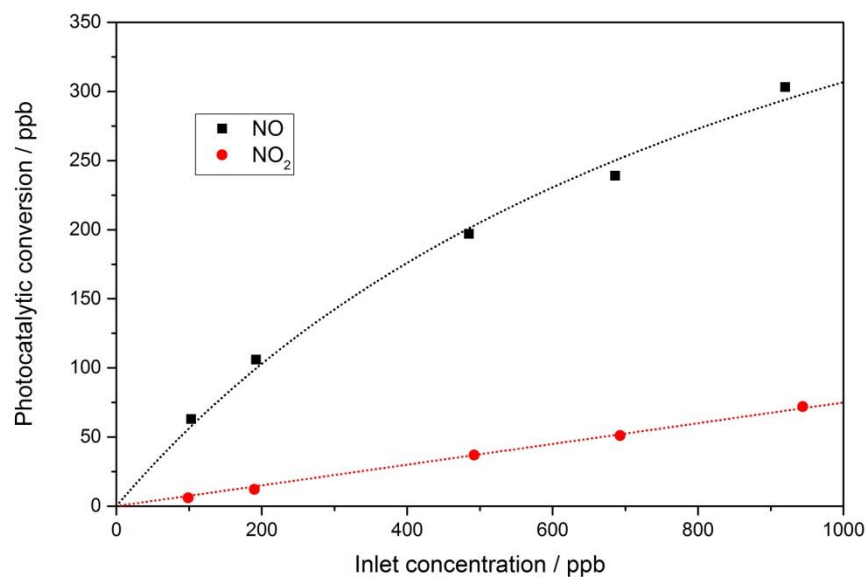

**Figure S1** The photocatalytic conversion of NO and NO<sub>2</sub> over P25 with varying inlet concentrations. Conditions according to ISO 22197-1 except inlet concentration, the conversion was calculated from the concentrations present after 4h of illumination.

**Table S1** Conversion of NO and NO<sub>2</sub> with varying inlet concentrations, determined in separate experiments over illuminated P25, conditions and setup according to ISO 22197-1 except inlet concentration. Conversion and selectivity were calculated from the concentrations present after 4h of illumination.

| Inlet NO concentration | NO Conversion | Selectivity (4h) | Inlet NO <sub>2</sub> concentration | NO <sub>2</sub> Conversion | k <sub>NO</sub> | k <sub>NO2</sub> | k <sub>NO</sub> /k <sub>NO2</sub> |
|------------------------|---------------|------------------|-------------------------------------|----------------------------|-----------------|------------------|-----------------------------------|
| <b>920 ppb</b>         | 32.9%         | 15.6%            | <b>944 ppb</b>                      | 7.6%                       | 0.799           | 0.159            | 5.0                               |
| <b>686 ppb</b>         | 34.8%         | 14.8%            | <b>642 ppb</b>                      | 7.4%                       | 0.857           | 0.153            | 5.6                               |
| <b>485 ppb</b>         | 40.1%         | 13.1%            | <b>455 ppb</b>                      | 7.5%                       | 1.025           | 0.156            | 6.6                               |
| <b>192 ppb</b>         | 55.2%         | 12.8%            | <b>178 ppb</b>                      | 6.3%                       | 1.606           | 0.130            | 12.3                              |
| <b>103 ppb</b>         | 61.2%         | 15.1%            | <b>93 ppb</b>                       | 6.1%                       | 1.892           | 0.125            | 15.1                              |

**Figure S2** The change in NO, NO<sub>2</sub> and total NO<sub>x</sub> concentrations upon illumination of a P25 sample. Inlet concentrations approximately 500 ppb NO and 500 ppb NO<sub>2</sub>. Conditions and setup otherwise according to ISO 22197-1.

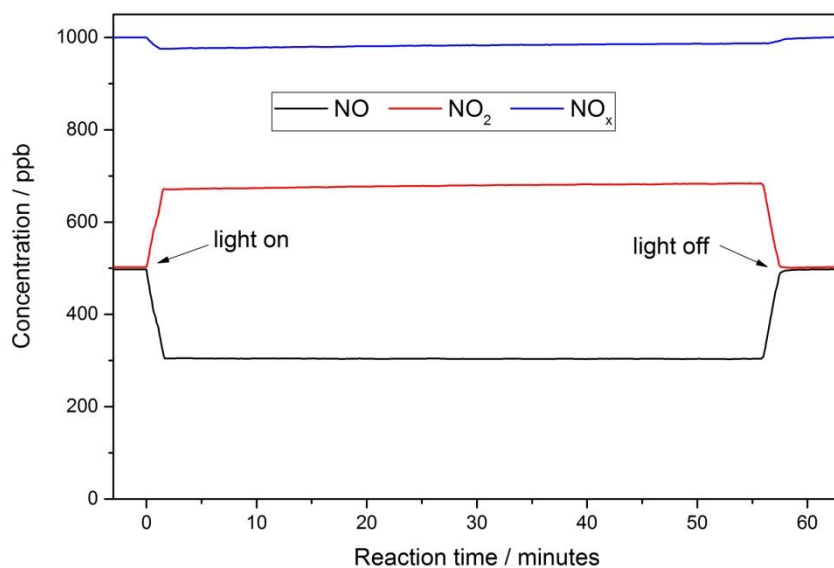

**Figure S3** The change in NO, NO<sub>2</sub>, total NO<sub>x</sub> and ozone concentrations upon illumination of a P25 sample. Inlet concentrations approximately 100 ppb NO, 100 ppb NO<sub>2</sub> and 40 ppb O<sub>3</sub>. Conditions and setup otherwise according to ISO 22197-1.

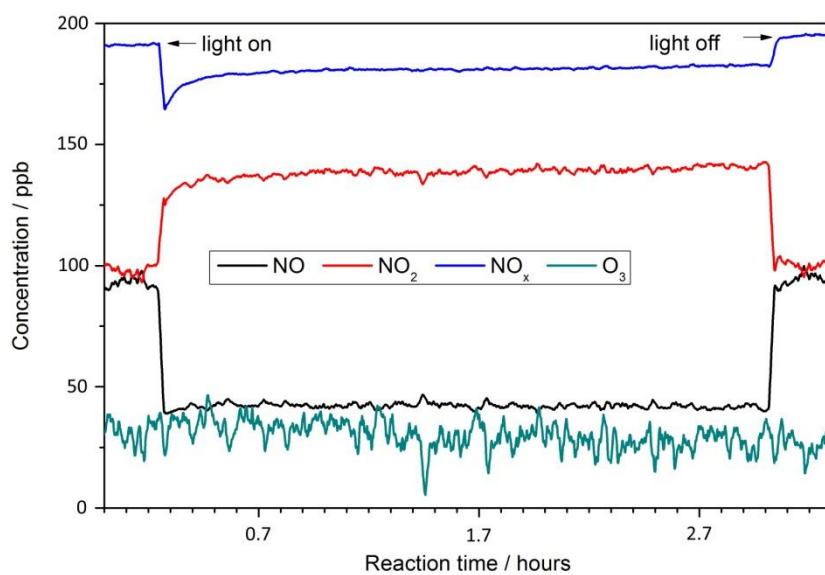

Supplement: c7cp05960d1.pdf [file c7cp05960d1.pdf]
